# The right time and place: time- and age-dependent vaccine-enhanced mucosal immunity to parasite infection

Wei Liu<sup>1,†</sup>, Tom N. McNeilly<sup>2,†,\*</sup>, Mairi Mitchell<sup>2</sup>, Stewart T.G. Burgess<sup>2</sup>, Alasdair J. Nisbet<sup>2</sup>, Jacqueline B. Matthews<sup>2,3,†</sup>, and Simon A. Babayan<sup>1,2,†,\*</sup>

<sup>1</sup>Institute of Biodiversity, Animal Health and Comparative Medicine, University of Glasgow, Glasgow, G12 8QQ, Scotland, UK,

<sup>2</sup>The Moredun Research Institute, Pentlands Science Park, EH26 0PZ, Scotland, UK,

<sup>3</sup>Roslin Technologies Limited, Roslin Innovation Centre, University of Edinburgh, Easter Bush, EH25 9RG, Scotland, UK

<sup>†</sup>These authors contributed equally to this work

\*Corresponding authors: [tom.mcneilly@moredun.ac.uk](mailto:tom.mcneilly@moredun.ac.uk), [simon.babayan@glasgow.ac.uk](mailto:simon.babayan@glasgow.ac.uk)

## Abstract

**Individuals vary broadly in their response to vaccination and subsequent exposure to infection, causing persistence of both infection and transmission. The prevalence of poor vaccine responders hampers the development of vaccines, especially against parasitic helminths. Yet despite having substantial economic and societal impact, the immune mechanisms that underlie such variability, especially at the site of parasite infection, remain poorly understood. Previous trials using a prototype vaccine for the control of the gastric parasitic *Teladorsagia circumcincta*, one of the highest impact parasites affecting sheep, revealed substantial variation in protection between individuals, which we hypothesised may in part be driven by age at vaccination. Here, to characterise how immunity at the mucosal site of infection developed in vaccinated lambs, we inserted gastric cannulae into the abomasum (true stomachs) of three-month- and six-month-old lambs before vaccination, and performed a longitudinal analysis of their local immune response during subsequent challenge infection. We found that the vaccine caused systemic changes in the baseline immune profile within the abomasum before any parasite exposure had occurred and reduced parasite burden and egg output once lambs were infected, regardless of age. However, age affected how vaccinated lambs responded to subsequent infection across multiple immune pathways, with only a minority of protective immune pathways being independent of age. This resulted in younger lambs being more susceptible to infection regardless of vaccine status. The identification of age-dependent (mostly adaptive) and age-independent (mostly innate) protective immune pathways should help refine the formulation of vaccines against these and potentially other helminth parasites of ruminants, and could indicate specificities of anti-helminth immunity more generally.**

Individuals vary widely in their responses to vaccination and little is known about the causes underlying low vaccine efficacy, nor how effective a vaccine will be “in the real world” against the pathogen for which it has been developed. In fact, for most pathogens, imperfect vaccination

39 is the rule rather than the exception (1). This is particularly problematic for helminths, as  
40 vaccination is the most promising alternative to anthelmintic drug treatments (2) in the face of  
41 extensive drug resistance, which is rising in human parasites (3, 4) and ubiquitous in many  
42 helminths of livestock, including in sheep (5–7). In both vaccinated and non-vaccinated  
43 animals, even a minority of infected individuals can release substantial numbers of helminth  
44 eggs into the environment, ensuring that infection persists within populations (8). While the  
45 need for better prediction of vaccine responsiveness has long been recognised, the complexity  
46 of the factors involved — from variation in genetic background (9, 10) to differences in age, sex,  
47 and immune history (11, 12), combined with immune evasion strategies deployed by helminths  
48 to ensure persistent infection (13–15) — have so far hampered the development of effective  
49 sub-unit vaccines for controlling helminths (16). Resistance to several anthelmintic compounds  
50 in sheep nematodes in the UK alone is estimated to cost in excess of £40M annually (17). With  
51 the need for effective vaccines ever more pressing, it is therefore urgent to identify which  
52 immune pathways mediate vaccine efficacy, and to understand how they change over time and  
53 with host age.

54 We recently developed a prototype subunit vaccine against *Teladorsagia circumcincta*, a  
55 major contributor to parasitic gastroenteritis in sheep. This parasitic nematode resides in the  
56 abomasum (the gastric compartment of the ruminant stomach) and is primarily a cause of  
57 disease in lambs. Third-stage larvae (L3) penetrate glands within 24 h of infection and grow  
58 rapidly, undergoing two moults before emerging into the abomasal lumen approximately 10  
59 days post-infection (18). The resulting pathology manifests as anorexia, diarrhoea and poor  
60 productivity. The prototype vaccine achieves 58–70% reduction in worm burdens and up to  
61 73–92% fewer eggs at the peak of worm egg shedding compared to challenge controls (19).  
62 Such reductions in cumulative worm faecal egg counts (cFEC) are expected to have a substan-  
63 tial impact on pasture contamination and modelling studies indicate that reductions of this  
64 magnitude will parallel effective anthelmintic-driven parasite control measures (20). However,  
65 substantial variation in the efficacy of this vaccine has been observed among individuals (19,  
66 21). Such variability can be due to multiple genetic and environmental factors (15, 22, 23).  
67 While genetic factors can be manipulated by selective breeding and environmental factors  
68 such as nutritional resource can be optimised under farming conditions, any vaccine against *T.*  
69 *circumcincta* is likely to be most effective if administered to lambs before exposure to worms on  
70 pasture and to protect them during the late spring/summer period in which their growth rate  
71 is most susceptible to the impact of parasitic gastroenteritis. This, however, raises concerns  
72 since the immature immune system is known to respond poorly to immunisation (24–26). We  
73 therefore sought to compare the efficacy and the immune responses to our prototype vaccine

74 in two different age groups, 3-month-old (3mo) and 6-month-old (6mo) lambs to attempt to  
75 understand age- and vaccine-dependent protective immunity at the site of infection to inform  
76 further optimisation of the vaccine.

77 How lambs of different ages respond immunologically to our prototype vaccine over  
78 the course of repeated exposure and during chronic infection by *T. circumcincta* is not  
79 known. We therefore analysed the immune gene expression pathways elicited by immunisation  
80 and subsequent repeated challenge infection with *T. circumcincta* in the abomasum using  
81 sequential gastric biopsies aligned to a novel machine-based learning approach, to characterise:  
82 (a) which immune pathways are associated with variation in parasite burdens and parasite egg  
83 output and when they are expressed during the course of infection;  
84 (b) at what time during the course of the infection are those pathways associated with protection,  
85 and (c) how those pathways are affected by both vaccination and host age.

## 95 Results

### 96 Vaccination reduced worm burdens and egg shedding in both 3mo and 6mo lambs.

97 We sought to identify the immune mechanisms underlying variation in the ability of the  
98 prototype vaccine to control *T. circumcincta* infection in lambs and to characterise how lamb age  
99 affects vaccine efficacy. Three- and six-month-old lambs were vaccinated using our previously-  
100 published protocol (19). Briefly, fifteen 3mo and fifteen 6mo lambs were administered an  
101 eight-protein cocktail of *T. circumcincta* recombinant antigens with Quil-A adjuvant, three  
102 times at three-weekly intervals. All vaccinated and non-vaccinated age-matched control lambs  
103 were then all exposed to repeated (“trickle”) infections with 12 consecutive challenges with *T.*  
104 *circumcincta* infective larvae (L3) delivered in measured doses spanning four weeks to mimic  
105 field challenge conditions (Fig. S1).

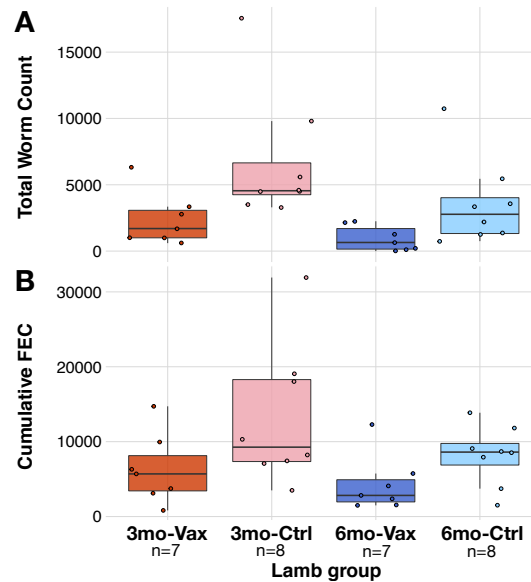

**Fig. 1.** Vaccine- and age-mediated control of *T. circumcincta* infection. (A), Worm burdens and (B), total egg output in 3 month-old lambs with vaccination (3mo-Vax), 3 month-old lambs with adjuvant only (3mo-Ctrl), 6 month-old lambs with vaccination (6mo-Vax), and 6 month-old lambs with adjuvant only (6mo-Ctrl). Immunisation with the prototype vaccine led to a median 73.7% reduction ( $P_{\text{vacc}} = 0.002$ , GLM) in worm counts and 50% reduction ( $P_{\text{vacc}} = 0.026$ , GLM) in cumulative egg output.

106 Vaccination led to significant reductions in both worm burden assessed at *post mortem*  
107 (Fig. 1A;  $P = 0.002$ ) and cumulative faecal egg counts (cFEC) (Fig. 1B;  $P = 0.026$ ) in both age  
108 groups relative to control lambs. In addition, 6mo lambs, whether immunised or not, controlled  
109 worm burdens more effectively than 3mo lambs ( $P = 0.012$ ). However, total egg output differed  
110 only marginally between age groups and was characteristically variable.

111 **Pathway enrichment was most predictive of vaccine efficacy prior to challenge and follow-**  
112 **ing parasitological events.**

113 Because worm burdens and cFEC varied substantially between individuals regardless of age  
114 or vaccination, we then sought to identify (i) which immune pathways were associated with  
115 controlling worm burdens at post-mortem (49 days after the start of challenge infection)  
116 and cFEC, and (ii) when their expression in the abomasum best predicted these measures  
117 of parasite infection. To address both questions, we built an analysis pipeline to identify the  
118 immune pathways that best predicted infection outcomes (Fig. S2). RNAseq was performed  
119 on biopsies taken repeatedly from the abomasum at temporal intervals. These produced six  
120 transcriptomes spanning 42 days for each lamb, beginning post-vaccination but shortly before  
121 the first challenge and ending one week prior to the end of the trial when the worm burden  
122 analysis was undertaken (Fig. S1). T-distributed stochastic neighbour embedding (t-SNE)  
123 suggested there was weak structure within the gene expression read counts of all 180 whole  
124 transcriptomes (Fig. S3). We then clustered transcripts into co-expression modules regardless  
125 of age using a weighted correlation network analysis (WGCNA (27)). This generated a reduced  
126 list of variables, each of which represented a set of genes that behaved similarly across all  
127 transcriptomes. To identify which of the resulting modules contained genes of interest, we  
128 used worm burdens and cFEC as response variables in ElasticNet regression models to which  
129 we mapped the eigenvalue of each WGCNA module, and used the coefficients learned by the  
130 ElasticNet to rank the modules according to the strength and direction of their association  
131 with either worm burden or cFEC (Fig. S4).

132 We then extracted all genes included within the modules that predicted either worm burden  
133 or cFEC, then entered that gene list into a canonical pathway analysis, and selected the resulting  
134 immune pathways (28). Fig. 2 presents the immune pathways that robustly predicted worm  
135 burdens of cFEC and their level of enrichment (proportion of genes within specific pathways  
136 that was detected in the transcriptome) at each time-point. This revealed that most immune  
137 pathways that predicted either parasite burden 49 days (D49) post-infection or cFEC were  
138 already enriched by D0, i.e. following immunisation, but prior to the first challenge. Pathways  
139 that were significantly represented exclusively at this time-point included B cell development

140 and activation signalling, as well as innate pathways involved in interferon and TNF signalling,  
 141 macrophage stimulating protein receptor signalling (MSP-RON), and the complement system  
 142 (Fig. 2, inner ring).

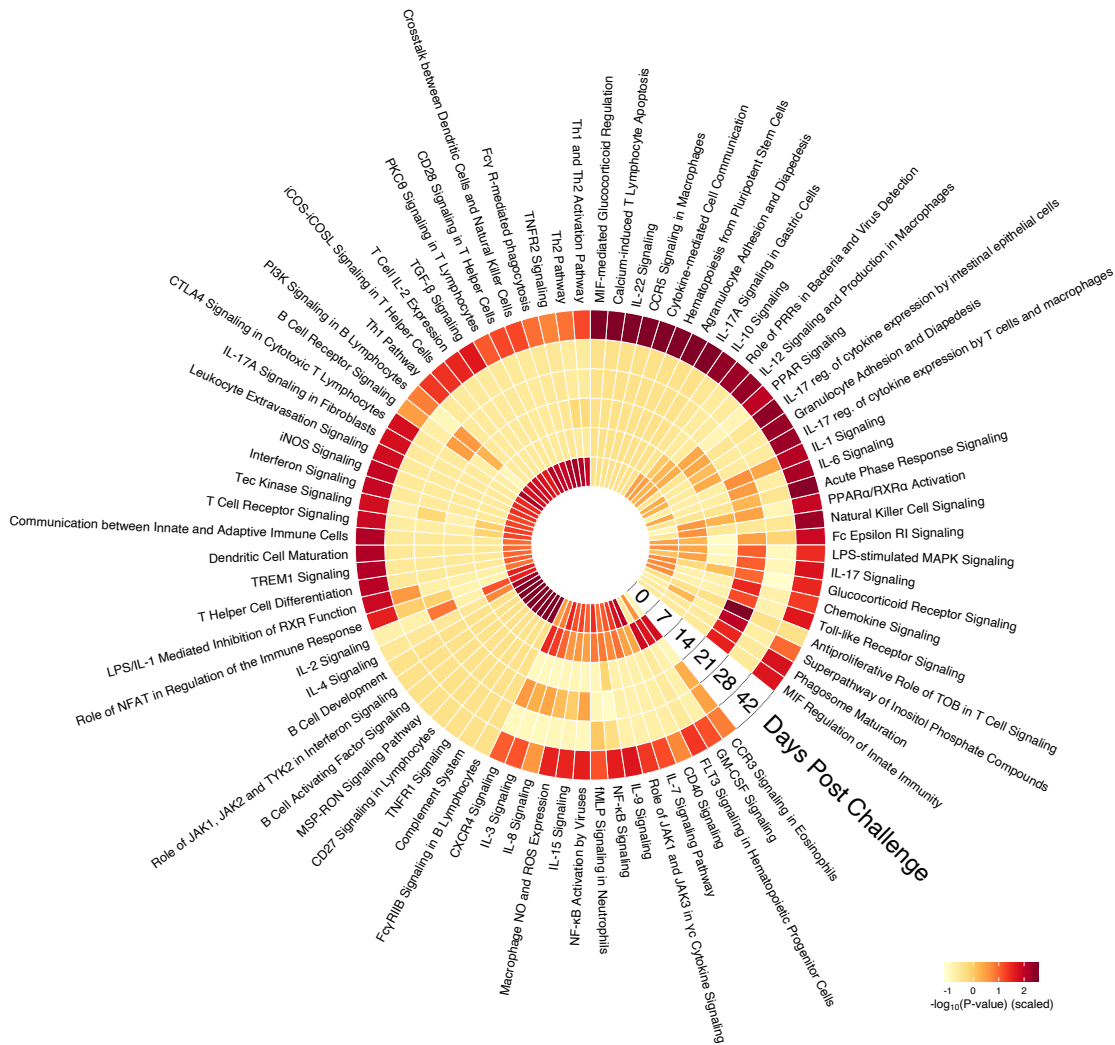

**Fig. 2.** Temporal dynamics of the expression of immune pathways that predict either post-mortem worm burden or cFEC identified by supervised machine learning ElasticNet. Heat map indicates the pathway enrichment reported as negative  $\log_{10}^{P\text{-value}}$ , where the dark red denotes stronger enrichment within each pathway. Each concentric circle represents one of six time-points at which abomasal biopsies were taken after challenge infection. Worm burdens predicted by these pathways were measured at D49 post challenge.

143 All other pathways significantly enriched at D0 were also enriched at subsequent time-  
 144 points. In particular, pathways whose expression correlated with worm or egg counts showed  
 145 significant enrichment at days 7, 21, and 42 post-challenge, consistent with the timing of three  
 146 significant phases of the life cycle, i.e. at D7, upon emergence of the first cohort of late fourth  
 147 stage larvae (L4)/early adults from the gastric glands into the lumen (29, 30), coinciding with

148 high enrichment scores of pathways involved in the regulation of innate responses (NF- $\kappa$ B,  
149 eosinophil CCR3, GMCSF, NO and ROS expression by macrophages, IL-2/IL-15, IL-3, and  
150 IL-8 signalling) as well as antigen-processing and lymphoid cell activation (FLT3, IL-7, CD40,  
151 CXCR4); at D21, co-incident with the initiation of egg-laying by the founding population of *T.*  
152 *circumcincta*, a further set of immune pathways was activated, including inflammatory and  
153 stress response signals (LPS-stimulated MAPK, MIF, glucocorticoid receptors, IL-17, and TLR  
154 signalling) and suppression of lymphocyte proliferation (anti-proliferative role of TOB in T  
155 cell signalling). Enrichment at D42 was elevated in the majority of pathways depicted in Fig. 2  
156 (see full timecourse for all pathways in Fig. S6 and Supplementary Data 2). Being close to  
157 the post-mortem time-point (D49), this likely reflects near-contemporaneous and potentially  
158 shorter-lived correlations between immune gene expression and parasite burdens, and were  
159 thus not considered further in the prediction of protective immunity. The very low enrichment  
160 scores in the remaining time-points likely indicates either low expression of the corresponding  
161 genes due to biological regulatory processes, or too much variance for any statistical pattern to  
162 be detected. We therefore decided to further focus on time-points D0, D7, and D21 for their  
163 relevance to predicting vaccine-mediated immunity against *T. circumcincta* in these lambs.

164 **Direction and strength of correlation between immune pathway expression and parasito-**  
165 **logical measures varied between time-points.**

166 To identify the time-points at which the selected pathways (Fig. 2) best predicted reduced  
167 parasite burdens and cFEC, we assessed the direction and strength of the correlations between  
168 each pathway and either parasite burden (Fig. 3A) or cFEC (Fig. 3B) before (D0) or 7 and 21  
169 days following the first exposure to *T. circumcincta* L3. For ease of interpretation, we then  
170 clustered immune pathways according to whether they were negatively associated with parasite  
171 burdens at each, or all, of these time-points.

172 Comparing the expression of immune pathways at D0 in vaccinated lambs and non-  
173 vaccinated controls indicated that IL-6, Th1, PPAR, and interferon signalling pathways elicited  
174 by the vaccine were instrumental in reducing parasite numbers at post-mortem (D49), while  
175 higher activation of IL-17A, IL-9, CCR3, and TGF- $\beta$  signalling pathways in vaccinated lambs  
176 prior to infection predicted lower egg shedding. In non-vaccinated lambs, no pathways were  
177 predictive of lower worm numbers, whereas IL-17A, CCR3, and chemokine signalling pathways  
178 were identified as predictors of low cFEC.

179 At D7, Th1 and PPAR signalling remained negatively associated with post-mortem worm  
180 burden in vaccinates, while most other pathways were either positively or not associated with  
181 worm burdens. With regard to egg shedding, in vaccinated lambs activation of IL-17A remained

182 negatively associated with cFEC, with pathways associated with regulation of T cell activation  
183 and Th1 polarisation (TOB and IL-12 pathways, respectively) also associated with reduced  
184 cFEC. Similar to D0, no immune pathways were predictive of lower parasite numbers in control  
185 lambs, although CCR3 and chemokine signalling pathways remained consistently, though  
186 weakly, negatively associated with cFEC.

187 Finally, at D21 vaccinated lambs differed from controls by exhibiting strong negative  
188 associations between worm burdens and chemokine signalling, IL-6, NF $\kappa$ B, natural killer  
189 cells, glucocorticoid receptor and acute phase response signalling, suggesting a potential role  
190 for responses to tissue injury in vaccine-induced protection against *T. circumcincta* (Fig. 3).  
191 Additionally, pathways associated with T cell activation and polarisation (IL-12, DC maturation,  
192 TOB, NFAT, Th1 and Th2 signalling pathways) were all negatively associated with worm burden  
193 at this time-point. In the non-vaccinated lambs, no pathways at D21 showed any association  
194 with worm burdens. With regard to predicting vaccine-induced impacts on cFEC, many of the  
195 pathways associated with reduced worm burdens at D21, in particular chemokine signalling,  
196 IL-6, and acute phase response signalling, were also predictive of lower cFEC in vaccinates.  
197 Lower egg shedding in vaccinated lambs was also associated with increased expression of  
198 CD27 in lymphocytes, and macrophage migration inhibitory factor (MIF). Interestingly, in  
199 non-vaccinated lambs, IL-7, IL-9, FLT3, and CCR3 signalling were negatively associated with  
200 parasite egg shedding at D21, whereas these signalling pathways were positively associated  
201 with cFEC in vaccinated lambs at the same time-point post-challenge.

#### 202 **Protective immune pathways were differentially affected by age and vaccination status.**

203 We then sought to analyse how the age of lambs at immunisation affected their expression of  
204 protective immune pathways at the same time-points. Overall, the mean gene expression levels  
205 for most of the pathways described above were most strongly expressed in the older (6mo) vac-  
206 cinates at D21 than at the two other time-points (Fig. 4A). Six-month-old lambs also displayed  
207 a greater differential in gene expression between D0 and D21, regardless of vaccination status.  
208 Indeed, while mean gene expression of immune pathways over all time-points was often greater  
209 in 3mo lambs, gene expression levels varied little over time in the 3mo lambs, particularly  
210 in non-vaccinated individuals. To assess how age and immunisation explained the observed  
211 variation in the expression of the focal immune pathways, we constructed generalised linear  
212 models for each pathway in turn with age, vaccine status, and the interaction between age and  
213 vaccine as explanatory variables. Most protective pathways identified by the ElasticNet (Fig.3)  
214 were affected by lamb age, especially pathways involved in the activation of adaptive immunity  
215 and its maintenance, spanning Th1, Th2, and Th17 pathways (Fig. 4B 'Age  $\times$  Vaccine' column).

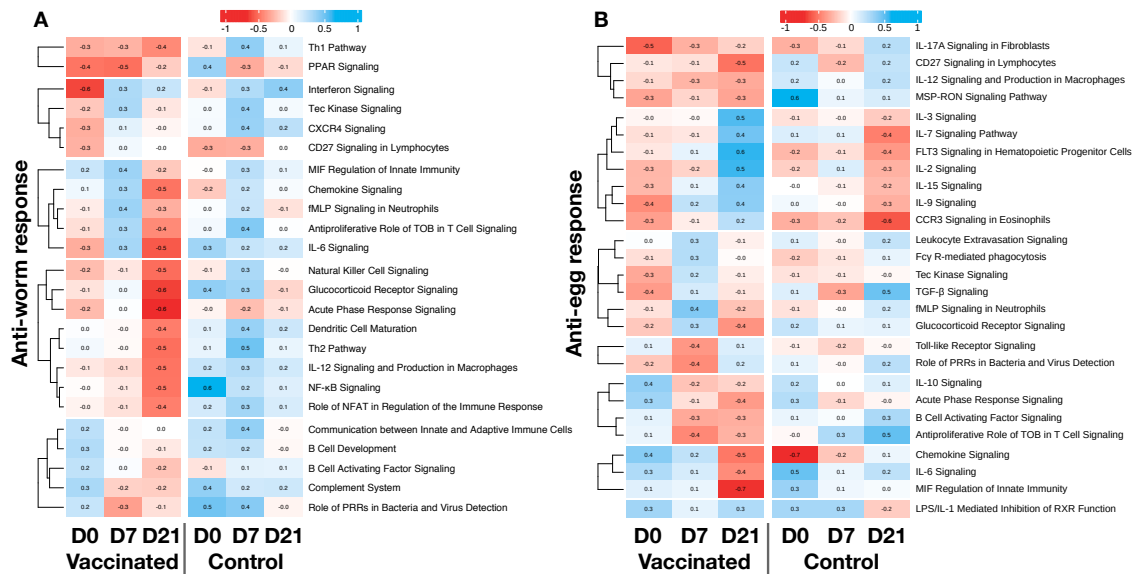

**Fig. 3.** Heat map of correlation coefficients between (A), worm burdens or (B), cFEC and gene expression in the selected pathways before challenge (D0), seven (D7) and 21 (D21) days post challenge in vaccinated and control lambs. Colours represent negative (red) and positive (blue) Pearson correlation coefficients for each comparison. The immune pathways were clustered using k-means according to their correlation patterns over time in the vaccinated group.

216 Pathways that were elicited by vaccination independently of age included acute phase response  
 217 signalling, LPS-mediated inhibition of RXR function, MIF Regulation of Innate Immunity,  
 218 and Toll-like Receptor Signalling (Fig. 4B, 'Vaccine' column). Finally, regardless of vaccination,  
 219 only Antiproliferative Role of TOB in T Cell Signalling and possibly the Complement System  
 220 were affected by age, with 6mo lambs expressing them at lower levels than 3mo lambs (Fig. 4B  
 221 'Age' column).

## 222 Discussion

223 Responses to immunisation vary greatly between individuals. While factors such as age, sex,  
 224 and nutritional status are known to modulate vaccine efficacy, substantial variation in immune  
 225 responses between individuals and over time within the same individual confound efforts to  
 226 develop vaccines against chronic infections. For sheep exposed to gastrointestinal parasites  
 227 such as *T. circumcincta*, the immune system is a crucial line of defence as drug resistance  
 228 among parasites becomes ubiquitous. Vaccines therefore have considerable potential to protect  
 229 the welfare and productivity of livestock. However, which immune pathways a vaccine ought to  
 230 elicit against gastrointestinal helminth infections is largely unknown and may not necessarily  
 231 be the same naturally-induced responses that the hosts have evolved under normal exposure  
 232 to the pathogen. Indeed, hosts may prioritise tissue integrity and tolerance over protective



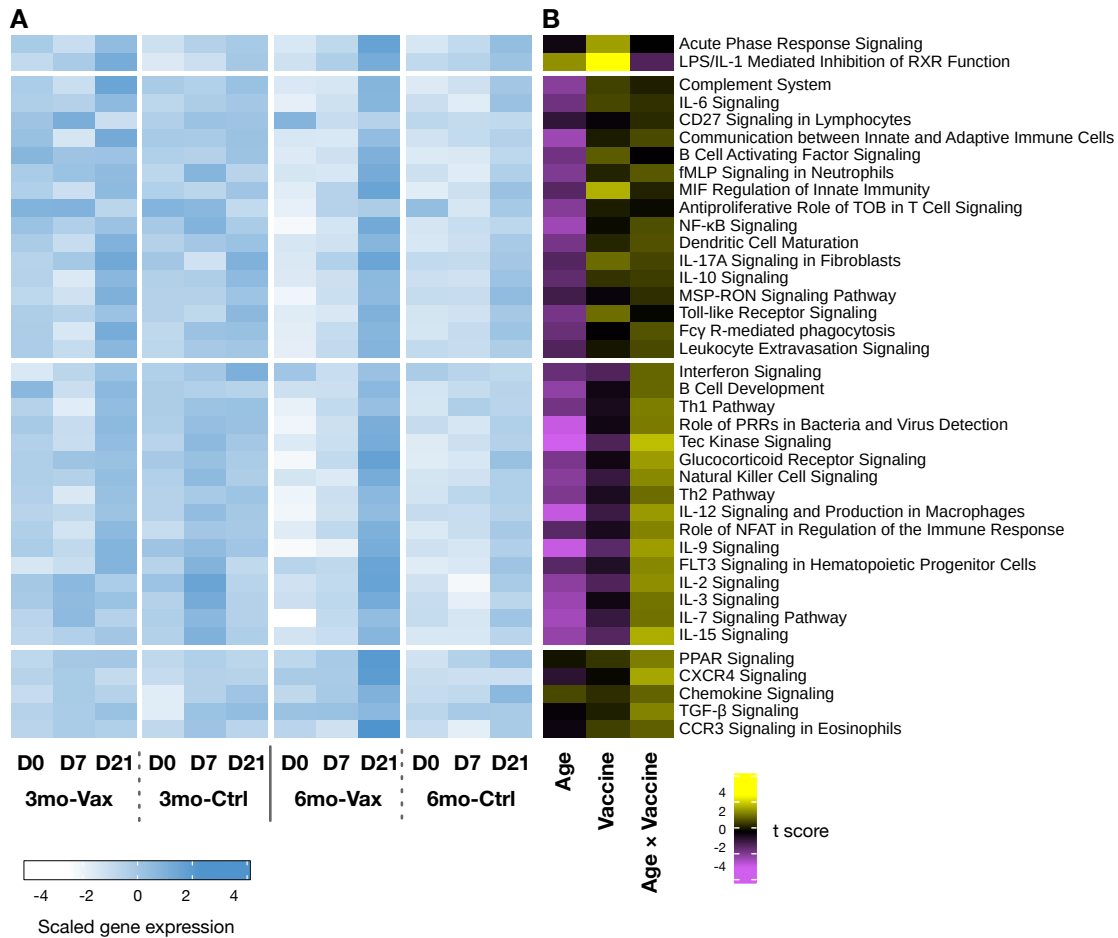

**Fig. 4.** Gene expression within immune pathways significantly affected by immunisation, age, or both. (A) Heat map of gene expression over time within the four treatments (3mo-Vax, 3mo-Ctrl, 6mo-Vax, and 6mo-Ctrl). High to low scaled expression is denoted with blue to white hues. (B) Heat map of a generalised mixed model t value statistic (number of standard deviations from the mean) (31) indicating the effect of age, vaccination, and the interaction between age and vaccination on the expression of each pathway. Purple indicates a dampening effect on the expression of the pathway while yellow indicates increased expression of that pathway relative to the global average. Pathways included are those presented in Fig. 2A and 2B. The full list of gene expression is available in Fig. S6.

233 immunity, which may be counterproductive to livestock welfare and productivity goals. Further,  
234 mass immunisation depends on the creation of a recombinant vaccine. This has proven difficult,  
235 with few successes despite decades of research.

236 We have recently developed a prophylactic vaccine that shows great promise against *T.*  
237 *circumcincta* (19). However, for this prototype to deliver consistent protection a better under-  
238 standing of the immune mechanisms that underlie the observed imperfect immunisation in  
239 sheep of relevant ages is needed (20). The present study was aimed at characterising, among  
240 the immune pathways elicited by the vaccine before and during infection by *T. circumcincta*,  
241 those that led to protection, and at which phase of the infection they were most effective. We  
242 monitored immune responses of vaccinated sheep at the site of infection (the abomasum) over  
243 the first 42 days of a trickle challenge infection, and measured parasite burdens on day 49.  
244 To assess how host age affects vaccine efficacy, we immunised lambs at 3 or 6 months of age.  
245 Consistent with our previous reports (19, 32), the vaccine led to significant reductions of both  
246 worm burdens and egg outputs compared to adjuvant (Quil A) only recipients (Fig. 1). However,  
247 3-month-old lambs remained more heavily infected than 6-month-old lambs throughout the  
248 experiment, consistent with previous reports in ruminants that the immature immune system  
249 responds poorly to prior immunisation (33, 34). Further, age differentially affected the ability  
250 of sheep to control worm numbers and the numbers of parasite eggs produced in their faeces:  
251 while we observed a significant reduction of parasite burden in 6-month-old animals irrespect-  
252 ive of their vaccination status, age alone did not significantly affect total egg output (Fig. 1).  
253 This suggests that maturation of the immune system allows better control of *T. circumcincta*  
254 worm burden with age but may have a more limited effect on parasite transmission via parasite  
255 egg shedding. Such apparent compensation and density-dependent fecundity in parasites have  
256 been previously observed in this (35) and other host-parasite systems (36–38). Further, while  
257 the prototype vaccine reduced parasite and egg densities, it did not totally eliminate the pres-  
258 ence of high worm egg shedders, raising the possibility that inherently “wormy” individuals  
259 may not respond well to vaccination. Reducing infection in these poor vaccine responders is of  
260 particular importance for limiting the spread of infection in vaccinated flocks.

261 In this study, we took a novel systems vaccinology approach to identify immune tran-  
262 scriptional pathways that predict both post-mortem worm burdens and cFEC in vaccinated  
263 individuals. While similar approaches have been taken to understand the mechanisms by  
264 which vaccines stimulate protection, these have largely focused on repeated analysis of blood  
265 leukocyte transcriptomes which are clustered into blood transcriptional modules (BTM) and  
266 subsequently correlated with antibody or cellular immune phenotypes (39–41). This approach,  
267 while providing important information on immune pathways involved in vaccine responses,

268 relies on capturing transcriptomic signatures of recirculating leukocytes which may not truly  
269 reflect the immune response at the site(s) of infection or vaccination. In contrast, the applica-  
270 tion of a gastric cannulation technique in this study allowed repeated sampling of the gastric  
271 mucosa, resulting in an unparalleled temporal evaluation of the local transcriptomic responses  
272 over time at the parasite's predilection site. Furthermore, we used a novel machine-learning ap-  
273 proach to maximise the generalisability of the qualitative and quantitative associations between  
274 immune responses and worm numbers or fecundity. Thus, the combination of repeated *in*  
275 *situ* sampling, unbiased selection of immune mediators of vaccine-driven protection, and  
276 pathway analysis, allowed us to generate a biologically-interpretable, robust, and dynamical  
277 representation of how vaccination affects the immune response to *T. circumcincta* infection in  
278 lambs.

279 Using this approach, analysis of the immune response at the site of infection revealed that  
280 three main events were indicative of interactions between vaccination and parasite life history  
281 and were predictive of parasite burdens. First, priming of the immune system by the vaccine  
282 prior to challenge: immune pathways that determined the worm burdens measured at day  
283 49 post challenge were already highly activated in the transcriptomes before challenge, likely  
284 driven by the pre-challenge vaccination. Second, the response to parasite life history events:  
285 while reduced pathway enrichment observed between days 7 and 28 suggests a down-regulation  
286 of immune activity in the abomasum once founder populations of parasites had established  
287 infection, we observed an activation of more directed responses to ongoing parasitological  
288 events involved in innate responses (e.g. eosinophil CCR3, NF- $\kappa$ B activation and NO/ROS  
289 expression by macrophages) and antigen-processing and lymphocyte recruitment and activ-  
290 ation (CD40, IL-7, CXCR4 signalling) 1–2 weeks post-challenge, matching the timing of the  
291 emergence of the first larvae from the gastric glands (42). This was followed by inflammatory  
292 and stress responses (e.g. IL-17 signalling, TLR-signalling, glucocorticoid receptor signalling)  
293 around 3 weeks after infection when parasites begin producing eggs (see Fig. 2). And third, the  
294 tighter correlations between gene expression levels and parasite numbers at the last sampling  
295 time-point immediately prior to post-mortem analysis of worm burdens (day 42) point to  
296 confounding between the effects of vaccination and the temporal proximity between immune  
297 tissue sampling (day 42) and measurement of parasite counts (day 49).

298 Further investigation therefore focused on three time-points, days 0, 7 and 21, which were  
299 most predictive of parasite numbers and/or fecundity, to identify pathways that were associated  
300 with vaccine-induced protection. Of most interest were protective pathways enriched in the  
301 mucosa of vaccinated lambs immediately prior to challenge. These included Th1, IL-6 and  
302 interferon signalling pathways which negatively correlated with worm burdens, and IL-17A,

303 IL-9, CCR3 and TGF- $\beta$  pathways associated with lower parasite egg output, and suggested  
304 that the systemically delivered vaccine was able to modulate the immune system at a distant  
305 mucosal site. This was a rather surprising observation, as while immune signatures have  
306 previously been reported in peripheral blood, for example following yellow fever and influenza  
307 vaccination (40, 43), systemically delivered vaccines are generally considered poor at inducing  
308 mucosal immune responses due to the inability of the vaccines to induce appropriate homing  
309 receptors on activated lymphocytes (44). Furthermore, while some adjuvants (e.g. TLR agonists  
310 and bacterial ADP-ribosylating toxin adjuvants) have been shown to confer mucosal homing  
311 properties (45), this has not been widely reported for saponin-based adjuvants such as Quil-A  
312 used here, although our results are consistent with an earlier study of a systemically delivered  
313 *Ostertagia ostertagi* subunit vaccine formulated with Quil-A that reported similar mucosal  
314 priming of immune cells, and in particular natural killer (NK) cells (46).

315 Regardless of the mechanism by which this mucosal priming operates, the vaccine appears  
316 to promote a protective Th1/Th17 type response within the mucosa, with evidence of active  
317 Th17 polarisation potentially via IL-6 and TGF- $\beta$  (47–49), as well as evidence of enrichment  
318 of Th2-associated pathways, CCR3 and IL-9, more established effectors of anti-parasite im-  
319 munity (50), possibly via MIF, which was recently reported as essential to type 2 immunity  
320 against *Heligmosomoides polygyrus* in mice (51). Interestingly, some of these pathways (MIF,  
321 IL17A, and CCR3) were also associated with reduced parasite egg output in control lambs, sug-  
322 gesting that of the protective pathways induced by the vaccine, anti-worm Th1 responses were  
323 most unique. The association of vaccine-induced protection with Th1 immunity was main-  
324 tained at day 7 post-infection, with Th1 pathways being associated with both worm burdens  
325 and egg output. By 21 days, a wider range of protective pathways were identified, including  
326 those associated with tissue injury and inflammation. At this time-point, both Th1 and Th2  
327 signalling pathways were associated with protection, indicating a broadening of the immune  
328 response.

329 While these associations will require further causal validation, they suggest that for optimal  
330 protection, the vaccine may prime the mucosa towards a Th1 and potentially Th17-type response  
331 early in infection before broadening out to a more mixed Th1/Th2 response. This is potentially  
332 contentious, as it is well-established in numerous animal models that protective immunity to  
333 gastrointestinal parasites, including *T. circumcincta*, is associated with Th2 immunity, whereas  
334 Th1 and Th17 immunity is associated with susceptibility (52–56). However, this appears to be  
335 a rather simplistic model based on counter-regulation of Th immune responses derived from  
336 tightly-controlled laboratory models and/or analysis of responses at limited time-points post-  
337 infection. Indeed, our longitudinal sampling at the site of parasite infection coupled with whole-

338 transcriptome analysis is likely to have allowed a finer description of the sequence of protective  
339 responses, revealing contributions to the protective response of Th1, Th17 and Th2 responses  
340 at different phases of the infection within the same individual. These results are consistent  
341 with a previous study in sheep, in which natural resistance to *T. circumcincta* was associated  
342 with early Th1 responses prior to development of Th2 immunity (57), and a more recent  
343 study in which early activation of the Th17 pathway was associated with natural resistance to  
344 *Haemonchus contortus* in goats (58). The role of Th17 in protection is potentially explained  
345 by the ability of this pathway to elicit innate lymphoid cells and multipotent progenitor type  
346 2 cells early in infection that subsequently promote CD4<sup>+</sup> Th2 cells and associated cytokine  
347 expression (59–61). This then activates antiparasitic effector cells such as eosinophils (62, 63),  
348 consistent with our finding that CCR3 signalling in eosinophils at D21 post challenge was  
349 negatively associated with egg output (Fig. 3). The previous association of Th17 responses with  
350 susceptibility was determined after more long-standing (12 week) *T. circumcincta* infection (56),  
351 where the association could be explained by triggering of Th17 responses secondary to gut  
352 barrier disruption (64).

353 Further investigation into how vaccination and age affected the expression of these immune  
354 pathways revealed that 6mo lambs increased the expression of the pathways to a greater  
355 level than did 3mo lambs at D21, which coincides with the first emergence of parasites from  
356 gastric crypts into the lumen of the abomasum (29, 30). This age-dependant expression of  
357 protective immune pathways largely involved the activation and maintenance of the adaptive  
358 response. This late maturation of the adaptive response to helminths observed in lambs is  
359 consistent with reports of later maturation of T cells in sheep (65, 66) and in other host-parasite  
360 systems as previously reported (26). Conversely, innate pathways appeared age-independent  
361 for these two cohorts. However, vaccination alone significantly explained the upregulation of  
362 innate pathways such as those involved in acute phase response signalling, LPS/IL-1 mediated  
363 inhibition of RXR functions, TLR signalling, and MIF regulation pathways, only a subset  
364 of which are reported to be enhanced by saponin-based adjuvants (67, 68), the others likely  
365 induced by the infection.

366 In conclusion, most protective-associated pathways were induced by vaccination and in  
367 older animals; the immune pathways found to control adult worms and eggs only partially  
368 overlapped and were activated at different phases of the challenge infection, indicating the  
369 need for anthelmintic vaccines to stimulate a broad set of pathways, rather than just antibody  
370 production alone; protective pathways enriched pre-challenge in vaccinates suggest specific  
371 adjuvants, such as those promoting Th1/Th17 responses may be useful to improve vaccine  
372 performance.

## 373 **Methods**

### 374 **Lambs & Infection.**

375 Texel cross lambs were randomly allocated to four groups which were balanced for weight and sex. The  
376 groups comprised vaccinated 3-month-old lambs (n = 15), control (adjuvant only) 3-month-old lambs  
377 (n = 16), vaccinated 6-month-old lambs (n = 15), and control (adjuvant only) 6-month-old lambs (n = 16).  
378 All lambs were infected with 2,000 *T. circumcincta* L3 stage larvae three times per week for four weeks  
379 beginning on the day of the final immunisation.

### 380 **Prototype vaccine formulation.**

381 Each lamb in the vaccinated groups was injected with 400 µg of a recombinant protein mix as described  
382 previously (19), containing 50µg of each protein. PBS soluble proteins Tci-ASP-1, Tci-MIF-1, Tci-TGH-2, Tci-  
383 APY-1, Tci-SAA-1, Tci-CF-1 and Tci-ES20 were administered as a single injection with 5mg Quil-A (Brenntag  
384 Biosector). Tci-MEP-1 was administered separately in PBS with 2M urea and 5mg Quil-A. Injections were  
385 given subcutaneously at two sites on the neck. Control animals received injections containing PBS/urea  
386 and Quil-A only. Lambs received three immunisations at three-weekly intervals (day 0, 21, 42) with the  
387 first immunisation at 3 or 6 months of age (Fig. S1).

### 388 **Sampling.**

389 Seven animals in each vaccine group and eight animals in the control groups were fitted with abomasal  
390 cannulae, as previously described (69), to allow repeated biopsy of the abomasal mucosa throughout the  
391 trickle infection period. Briefly, peri-operative analgesia was administered prior to anaesthetic induction  
392 using Meloxicam (Metacam®, Boehringer Ingelheim) at 1 mg/kg body weight (BW). Anaesthesia was  
393 induced by intra-venous Propofol (PropoFlo™, Zoetis) at 3mg/kg BW and maintained using Isoflurane  
394 (IsoFlo™, Zoetis). Following surgical preparation of the site, the abomasum was located and exteriorised.  
395 Abomasal cannulae, constructed from a modified disposable 10 ml syringe barrels (PlastiPak™, Becton  
396 and Dickinson) (69), were fitted midway between the mesenteric border and the greater curvature of the  
397 lateral wall, approximately 7 cm cranial to the pylorus. The free end of the cannulae were exteriorised  
398 through a laparotomy incision in the abdominal wall, then anchored using external neoprene flanges.  
399 Surgery to fit the cannulae was performed between the second and third immunisation time-points. Over  
400 49 days, abomasal biopsies were taken using a pair of 30 cm long 5 mm × 2 mm punch mucosal biopsy  
401 forceps (Richard Wolf GmbH), inserted via the cannulae as follows: three biopsies per animal at each  
402 time-point on days 0, 7, 14, 21, 28, 42, and 49 (Fig. S1). The three biopsies per animal were taken in a  
403 clockwise manner to ensure different sites of the abomasal mucosa were sampled. Samples were placed  
404 immediately into RNAlater (Sigma-Aldrich) and stored at -80 °C for subsequent RNA extraction.

### 405 **RNA-Seq library preparation and sequencing.**

406 Total RNA was extracted from the abomasal biopsies as follows: the 645 abomasal biopsy samples were  
407 homogenised in RLT buffer (Qiagen Ltd, UK) using a Precellys bead basher (Bertin Instruments, UK) with  
408 CK28 bead tubes (Stretton Scientific, UK). Samples were centrifuged at 14,000 g at 4°C for 10 mins and  
409 the supernatant collected for processing using a RNeasy mini-isolation kit (Qiagen Ltd, UK) according to  
410 the manufacturers' protocol, including an on-column DNase digestion. RNA quality and integrity were  
411 assessed using a Nanodrop spectrophotometer (Thermo Fisher, UK) and a Bioanalyser RNA Nanochip  
412 (Agilent Technologies Ltd, UK). The yield of total RNA was determined on a Qubit Fluorometer (Thermo  
413 Fisher, UK) using the Broad Range RNA kit (Thermo Fisher, UK). The RNA isolated from three biopsies  
414 per animal for each time-point was pooled 1:1:1 by weight to generate the final samples for RNA-seq  
415 assessment. The resulting 180 RNA samples were sequenced on an Illumina NextSeq 500 by Glasgow  
416 Polyomics (70) generating 75 bp paired-end reads at an average sequencing depth of 25 Mbp/sample.

#### 417 **RNA-Seq quality control and alignment.**

418 The sequencing quality controls were finished by FastQC (v0.11.5), which provides a comprehensive  
419 report for each RNA-Seq sample. Base calls were made using the Illumina CASAVA 1.8 pipeline. All 180  
420 samples passed the QC filters (MultiQC (71) report, Supplementary Data 1), suggesting that RNA extraction  
421 and subsequent sequencing were of good quality and cutadapt (v1.11) was used for adapter trimming.  
422 Pseudo alignment of the read data to the latest version of the sheep transcriptome (cDNA) (Oar-v3.1) was  
423 performed with Kallisto v0.46.2 (72), generating read count data for each transcript across all samples.  
424 The R package tximport (73) was used to prepare the abundance matrix for downstream analysis. All  
425 samples were normalised using DESeq2 (74) and genes with read counts greater than five across at least  
426 two samples were selected for downstream analysis.

#### 427 **Gene network analysis and machine learning.**

428 We first evaluated whether any structure in gene expression could be visualised using t-Distributed  
429 Stochastic Neighbour Embedding (t-SNE). To reduce the dimensionality of the transcriptome, we then  
430 used the R package Weighted Correlation Network Analysis (WGCNA) (27) to generate gene co-expression  
431 networks from vaccinated groups (3mo-Vax and 6mo-Vax) at six time-points after start of the challenge  
432 (Days 0 – 42), using the full transcriptome. WGCNA groups genes and builds networks using the co-  
433 expression similarity measure defined as  $S_{i,j} = \left(\frac{1}{2} + \frac{1}{2}corr(x_i, x_j)\right)^\alpha$ , where  $S_{i,j}$  is the correlation between  
434 gene expressions  $x_i$  and  $x_j$ , and  $\alpha$  is the soft threshold weight selected by scale-free topology criterion (27,  
435 75) set at 6 (Day 0), 8 (Day 7), 7 (Day 14), 12 (Day 21), 8 (Day 28), and 9 (Day 42). The eigengene of  
436 each cluster was used to quantify its overall expression. To select the genes which best predicted the  
437 parasitological read-out of interest (i.e., worm burdens and cFEC), we used the ElasticNet algorithm (76)  
438 from Python's Scikit-Learn software library to fit a linear regression between the eigengenes and worm  
439 burdens or cFEC, and then ranked the gene clusters by their resulting coefficients. All WGCNA modules  
440 for which the ElasticNet coefficient was not null were retained for further pathway analysis.

#### 441 **Pathway analysis.**

442 Pathway enrichment was generated with Ingenuity Pathway Analysis (IPA, QIAGEN Inc.) (28) in which  
443 each gene identifier was mapped to its corresponding gene object in Ingenuity's Knowledge Base using  
444 canonical pathway analysis to identify the biological pathways of most significance. Only immune  
445 pathways among those identified in IPA (Supplementary Data 2) were retained for further analysis.

#### 446 **Time series differential gene expression analysis.**

447 The R package maSigPro (77), a two-step regression to find significant differences between treatments  
448 over time, was used for gene differential expression analysis with multiple time-points (Supplementary  
449 Data 3).

#### 450 **Statistical methods**

451 The effects of age and immunisation on both worm burdens and cFEC were assessed with generalised  
452 linear models for negative binomial distributions with a log link, and residuals tested for normality  
453 using the Jarque-Bera test for normality. The effects of age, immunisation, and their interaction on the  
454 eigengene of each immune pathway were assessed with linear mixed models using sampling date as a  
455 random effect to account for repeated sampling. The t statistic was used to indicate effect sizes as fold  
456 deviation between group means (31).

## 457 Acknowledgements.

458 We thank Leigh Andrews, Alison Morrison and Dave Bartley, Moredun Research Institute, for their help in  
459 conducting animal studies and in the provision of parasite material and the Bioservices Unit, Moredun  
460 Research Institute, for expert care of the animals. We also thank Manus Graham and Roy Davie, Moredun  
461 Research Institute, for assistance with gastric cannulation surgeries. This work was supported by the  
462 BBSRC (Grant references BB/M012956/1 and BB/M011968/1).

## 463 References

- 464 1. G. Weinberg, P. Szilagyi, Vaccine epidemiology: efficacy, effectiveness, and the translational research roadmap.  
465 *J Infect Dis* **201**, 1607–1610 (2010).
- 466 2. S. Bartsch *et al.*, Modeling the economic and epidemiologic impact of hookworm vaccine and mass drug  
467 administration (MDA) in Brazil, a high transmission setting. *Vaccine* **34**, 2197–2206 (2016).
- 468 3. S. Campbell, S. Nery, J. McCarthy, D. Gray, R. Soares Magalhães, A. Clements, A Critical Appraisal of Control  
469 Strategies for Soil-Transmitted Helminths. *Trends Parasitol* **32**, 97–107 (2016).
- 470 4. S. Doyle *et al.*, Genome-wide analysis of ivermectin response by *Onchocerca volvulus* reveals that genetic drift  
471 and soft selective sweeps contribute to loss of drug sensitivity. *PLoS Negl Trop Dis* **11**, e0005816 (2017).
- 472 5. E. Redman *et al.*, The emergence of resistance to the benzimidazole anthelmintics in parasitic nematodes  
473 of livestock is characterised by multiple independent hard and soft selective sweeps. *PLoS Negl Trop Dis* **9**,  
474 e0003494 (2015).
- 475 6. S. R. Doyle *et al.*, A major locus for ivermectin resistance in a parasitic nematode. *bioRxiv*, 298901 (2018).
- 476 7. H. Rose Vineer *et al.*, Increasing importance of anthelmintic resistance in European livestock: creation and  
477 meta-analysis of an open database. *Parasite* **27**, 69 (2020).
- 478 8. J. Lloyd-Smith, S. Schreiber, P. Kopp, W. Getz, Superspreading and the effect of individual variation on disease  
479 emergence. *Nature* **438**, 355–359 (2005).
- 480 9. D. Beraldi *et al.*, Quantitative trait loci (QTL) mapping of resistance to strongyles and coccidia in the free-living  
481 Soay sheep (*Ovis aries*). *Int J Parasitol* **37**, 121–129 (2007).
- 482 10. K. Periasamy *et al.*, Candidate gene approach for parasite resistance in sheep—variation in immune pathway  
483 genes and association with fecal egg count. *PLoS One* **9**, e88337 (2014).
- 484 11. A. Pedersen, S. Babayan, Wild immunology. *Mol Ecol* **20**, 872–880 (2011).
- 485 12. S. Babayan *et al.*, Wild immunology: converging on the real world. *Ann N Y Acad Sci* **1236**, 17–29 (2011).
- 486 13. T. McNeilly *et al.*, Suppression of ovine lymphocyte activation by *Teladorsagia circumcincta* larval excretory-  
487 secretory products. *Vet Res* **44**, 70 (2013).
- 488 14. C. Finlay, K. Walsh, K. Mills, Induction of regulatory cells by helminth parasites: exploitation for the treatment of  
489 inflammatory diseases. *Immunol Rev* **259**, 206–230 (2014).
- 490 15. R. Grensis, Immunity to helminths: resistance, regulation, and susceptibility to gastrointestinal nematodes.  
491 *Annu Rev Immunol* **33**, 201–225 (2015).
- 492 16. S. Babayan, J. Allen, D. Taylor, Future prospects and challenges of vaccines against filariasis. *Parasite Immunol.*  
493 **34**, 243–253 (2012).
- 494 17. J. Charlier *et al.*, Initial assessment of the economic burden of major parasitic helminth infections to the  
495 ruminant livestock industry in Europe. *Prev Vet Med* **182**, 105103 (2020).
- 496 18. T. McNeilly, E. Devaney, J. Matthews, *Teladorsagia circumcincta* in the sheep abomasum: defining the role of  
497 dendritic cells in T cell regulation and protective immunity. *Parasite Immunol* **31**, 347–356 (2009).
- 498 19. A. Nisbet *et al.*, Successful immunization against a parasitic nematode by vaccination with recombinant proteins.  
499 *Vaccine* **31**, 4017–4023 (2013).
- 500 20. E. Barnes, R. Dobson, I. Barger, Worm control and anthelmintic resistance: adventures with a model. *Parasitol*  
501 *Today* **11**, 56–63 (1995).



- 502 21. A. Nisbet et al., The rational simplification of a recombinant cocktail vaccine to control the parasitic nematode  
503 *Teladorsagia circumcincta*. *Int J Parasitol* **49**, 257–265 (2019).
- 504 22. M. Stear et al., The genetic basis of resistance to *Ostertagia circumcincta* in lambs. *Vet J* **154**, 111–119 (1997).
- 505 23. D. Nussey et al., Multivariate immune defences and fitness in the wild: complex but ecologically important  
506 associations among plasma antibodies, health and survival. *Proc Biol Sci* **281**, 20132931 (2014).
- 507 24. S. McClure, D. Emery, T. Bendixsen, R. Davey, Attempts to generate immunity against *Trichostrongylus col-*  
508 *ubriformis* and *Haemonchus contortus* in young lambs by vaccination with viable parasites. *Int J Parasitol* **28**,  
509 739–746 (1998).
- 510 25. K. McRae, M. Stear, B. Good, O. Keane, The host immune response to gastrointestinal nematode infection in  
511 sheep. *Parasite Immunol* **37**, 605–613 (2015).
- 512 26. S. Babayan, A. Sinclair, J. Duprez, C. Selman, Chronic helminth infection burden differentially affects haema-  
513 topoietic cell development while ageing selectively impairs adaptive responses to infection. *Sci Rep* **8**, 3802  
514 (2018).
- 515 27. P. Langfelder, S. Horvath, WGCNA: an R package for weighted correlation network analysis. *BMC Bioinformatics*  
516 **9**, 559 (2008).
- 517 28. A. Krämer, J. Green, J. Pollard, S. Tugendreich, Causal analysis approaches in Ingenuity Pathway Analysis.  
518 *Bioinformatics* **30**, 523–530 (2014).
- 519 29. D. Denham, The development of *Ostertagia circumcincta* in lambs. *J Helminthol* **43**, 299–310 (1969).
- 520 30. T. McNeilly et al., Niche-specific gene expression in a parasitic nematode; increased expression of immunomod-  
521 ulators in *Teladorsagia circumcincta* larvae derived from host mucosa. *Sci Rep* **7**, 7214 (2017).
- 522 31. D. Bates, M. Mächler, B. Bolker, S. Walker, Fitting linear mixed-effects models using lme4. *Journal of Statistical*  
523 *Software* **67** (2015).
- 524 32. A. Nisbet et al., Protection of ewes against *Teladorsagia circumcincta* infection in the periparturient period by  
525 vaccination with recombinant antigens. *Vet Parasitol* **228**, 130–136 (2016).
- 526 33. W. Smith, F. Jackson, E. Jackson, J. Williams, Age immunity to *Ostertagia circumcincta*: comparison of the local  
527 immune responses of 4 1/2- and 10-month-old lambs. *J Comp Pathol* **95**, 235–245 (1985).
- 528 34. J. Corpa, V. Pérez, J. García Marín, Differences in the immune responses in lambs and kids vaccinated against  
529 paratuberculosis, according to the age of vaccination. *Vet Microbiol* **77**, 475–485 (2000).
- 530 35. S. Bishop, M. Stear, The use of a gamma-type function to assess the relationship between the number of adult  
531 *Teladorsagia circumcincta* and total egg output. *Parasitology* **121**, 435–440 (2000).
- 532 36. T. Churcher, N. Ferguson, M. Basáñez, Density dependence and overdispersion in the transmission of helminth  
533 parasites. *Parasitology* **131**, 121–132 (2005).
- 534 37. T. Churcher, J. Filipe, M. Basáñez, Density dependence and the control of helminth parasites. *J Anim Ecol* **75**,  
535 1313–1320 (2006).
- 536 38. C. Bleay, C. Wilkes, S. Paterson, M. Viney, Density-dependent immune responses against the gastrointestinal  
537 nematode *Strongyloides ratti*. *Int J Parasitol* **37**, 1501–1509 (2007).
- 538 39. S. Li et al., Molecular signatures of antibody responses derived from a systems biology study of five human  
539 vaccines. *Nat. Immunol.* **15**, 195–204 (2014).
- 540 40. J. Hou et al., A Systems Vaccinology Approach Reveals Temporal Transcriptomic Changes of Immune Responses  
541 to the Yellow Fever 17D Vaccine. *J Immunol* **199**, 1476–1489 (2017).
- 542 41. R. Braun et al., System immunology-based identification of blood transcriptional modules correlating to  
543 antibody responses in sheep. *NPJ Vaccines* **3**, 41 (2018).
- 544 42. H. Simpson, Pathophysiology of abomasal parasitism: is the host or parasite responsible. *Vet J* **160**, 177–191  
545 (2000).
- 546 43. Y. Kotliarov et al., Broad immune activation underlies shared set point signatures for vaccine responsiveness in  
547 healthy individuals and disease activity in patients with lupus. *Nat Med* **26**, 618–629 (2020).
- 548 44. J. Clements, L. Freytag, Parenteral Vaccination Can Be an Effective Means of Inducing Protective Mucosal  
549 Responses. *Clin Vaccine Immunol* **23**, 438–441 (2016).

- 550 45. D. Frederick, J. Goggins, L. Sabbagh, L. Freytag, J. Clements, J. McLachlan, Adjuvant selection regulates gut  
551 migration and phenotypic diversity of antigen-specific CD4+ T cells following parenteral immunization. *Mucosal*  
552 *Immunol* **11**, 549–561 (2018).
- 553 46. A. González-Hernández et al., Host protective ASP-based vaccine against the parasitic nematode *Ostertagia*  
554 *ostertagi* triggers NK cell activation and mixed IgG1-IgG2 response. *Sci Rep* **6**, 29496 (2016).
- 555 47. M. Li, Y. Wan, R. Flavell, T cell-produced transforming growth factor-beta1 controls T cell tolerance and regulates  
556 Th1- and Th17-cell differentiation. *Immunity* **26**, 579–591 (2007).
- 557 48. P. Mangan et al., Transforming growth factor-beta induces development of the T(H)17 lineage. *Nature* **441**,  
558 231–234 (2006).
- 559 49. L. Zhou et al., IL-6 programs T(H)-17 cell differentiation by promoting sequential engagement of the IL-21 and  
560 IL-23 pathways. *Nat Immunol* **8**, 967–974 (2007).
- 561 50. H. Faulkner, N. Humphreys, J. Renauld, J. Van Snick, R. Grecis, Interleukin-9 is involved in host protective  
562 immunity to intestinal nematode infection. *Eur J Immunol* **27**, 2536–2540 (1997).
- 563 51. K. Filbey et al., Macrophage Migration Inhibitory Factor (MIF) Is Essential for Type 2 Effector Cell Immunity to an  
564 Intestinal Helminth Parasite. *Front Immunol* **10**, 2375 (2019).
- 565 52. N. Craig, H. Miller, W. Smith, P. Knight, Cytokine expression in naïve and previously infected lambs after challenge  
566 with *Teladorsagia circumcincta*. *Vet Immunol Immunopathol* **120**, 47–54 (2007).
- 567 53. V. Venturina, A. Gossner, J. Hopkins, The immunology and genetics of resistance of sheep to *Teladorsagia*  
568 *circumcincta*. *Vet Res Commun* **37**, 171–181 (2013).
- 569 54. R. Grecis, Th2-mediated host protective immunity to intestinal nematode infections. *Philos Trans R Soc Lond B*  
570 *Biol Sci* **352**, 1377–1384 (1997).
- 571 55. R. Maizels, E. Pearce, D. Artis, M. Yazdanbakhsh, T. Wynn, Regulation of pathogenesis and immunity in helminth  
572 infections. *J Exp Med* **206**, 2059–2066 (2009).
- 573 56. A. Gossner, V. Venturina, D. Shaw, J. Pemberton, J. Hopkins, Relationship between susceptibility of Blackface  
574 sheep to *Teladorsagia circumcincta* infection and an inflammatory mucosal T cell response. *Vet Res* **43**, 26  
575 (2012).
- 576 57. M. Hassan, J. Hanrahan, B. Good, G. Mulcahy, T. Sweeney, A differential interplay between the expression of  
577 Th1/Th2/Treg related cytokine genes in *Teladorsagia circumcincta* infected DRB1\*1101 carrier lambs. *Vet Res*  
578 **42**, 45 (2011).
- 579 58. H. Aboshady et al., Dynamic transcriptomic changes of goat abomasal mucosa in response to *Haemonchus*  
580 *contortus* infection. *Vet Res* **51**, 44 (2020).
- 581 59. S. Saenz et al., IL25 elicits a multipotent progenitor cell population that promotes T(H)2 cytokine responses.  
582 *Nature* **464**, 1362–1366 (2010).
- 583 60. S. Saenz et al., IL-25 simultaneously elicits distinct populations of innate lymphoid cells and multipotent  
584 progenitor type 2 (MPPtype2) cells. *J Exp Med* **210**, 1823–1837 (2013).
- 585 61. K. Smith et al., Concerted IL-25R and IL-4Ra signaling drive innate type 2 effector immunity for optimal helminth  
586 expulsion. *Elife* **7** (2018).
- 587 62. C. Martin et al., IL-5 is essential for vaccine-induced protection and for resolution of primary infection in murine  
588 filariasis. *Med Microbiol Immunol* **189**, 67–74 (2000).
- 589 63. J. Hernández, E. Meeusen, F. Rodríguez, D. Piedrafita, J. González, Increased susceptibility to *Haemonchus*  
590 *contortus* infection by interleukin-5 modulation of eosinophil responses in sheep. *Parasite Immunol* **42**, e12680  
591 (2020).
- 592 64. J. Kempski, L. Brockmann, N. Gagliani, S. Huber, TH17 Cell and Epithelial Cell Crosstalk during Inflammatory  
593 Bowel Disease and Carcinogenesis. *Front Immunol* **8**, 1373 (2017).
- 594 65. P. Outteridge, Development of cell-mediated immunity in young ruminants. *J Dairy Sci* **68**, 257–260 (1985).
- 595 66. I. Colditz, D. Watson, G. Gray, S. Eady, Some relationships between age, immune responsiveness and resistance  
596 to parasites in ruminants. *Int J Parasitol* **26**, 869–877 (1996).

- 597 67. N. Ho, L. Huis In 't Veld, T. Raaijmakers, G. Adema, Adjuvants Enhancing Cross-Presentation by Dendritic Cells:  
598 The Key to More Effective Vaccines. *Front Immunol* **9**, 2874 (2018).
- 599 68. R. Marty-Roix *et al.*, Identification of QS-21 as an Inflammasome-activating Molecular Component of Saponin  
600 Adjuvants. *Journal of Biological Chemistry* **291**, 1123–1136 (2016).
- 601 69. J. Huntley *et al.*, The sequential analysis of local inflammatory cells during abomasal nematode infection in  
602 periparturient sheep. *Vet Immunol Immunopathol* **97**, 163–176 (2004).
- 603 70. Glasgow-Polyomics, <http://www.polyomics.gla.ac.uk/>.
- 604 71. P. Ewels, M. Magnusson, S. Lundin, M. Källner, MultiQC: summarize analysis results for multiple tools and samples  
605 in a single report. *Bioinformatics* **32**, 3047–3048 (2016).
- 606 72. N. Bray, H. Pimentel, P. Melsted, L. Pachter, Near-optimal probabilistic RNA-seq quantification. *Nat Biotechnol*  
607 **34**, 525–527 (2016).
- 608 73. C. Sonesson, M. Love, M. Robinson, Differential analyses for RNA-seq: transcript-level estimates improve gene-  
609 level inferences. *F1000Res* **4**, 1521 (2015).
- 610 74. M. Love, W. Huber, S. Anders, Moderated estimation of fold change and dispersion for RNA-seq data with DESeq2.  
611 *Genome Biol* **15**, 550 (2014).
- 612 75. B. Zhang, S. Horvath, A general framework for weighted gene co-expression network analysis. *Stat Appl Genet*  
613 *Mol Biol* **4**, Article17 (2005).
- 614 76. H. Zou, T. Hastie, Regularization and variable selection via the elastic net. *Journal of the Royal Statistical Society:*  
615 *Series B (Statistical Methodology)* **67**, 301–320 (2005).
- 616 77. M. Nueda, S. Tarazona, A. Conesa, Next maSigPro: updating maSigPro bioconductor package for RNA-seq time  
617 series. *Bioinformatics* **30**, 2598–2602 (2014).
- 618 78. L. Maaten, G. Hinton, Visualizing data using t-SNE. *Journal of Machine Learning Research* (2008).

619 **Supplementary information**

620 **Supplementary Data 1**

621 multiqc-report-biopsy.html: Quality check report of 180 RNA-seq sample FastQC reports  
622 using MultiQC (71).

623 **Supplementary Data 2**

624 ipa\_3V\_6V.ods: Ingenuity Pathway analysis (IPA) results for all the WGCNA clusters shown  
625 in Fig. 2.

626 **Supplementary Data 3**

627 gene-cluster-masigpro.ods: Differentially expressed gene list between the age groups. The  
628 expression levels are shown in Fig. S5C.

629 **Supplementary Figures**

630 **Study design**

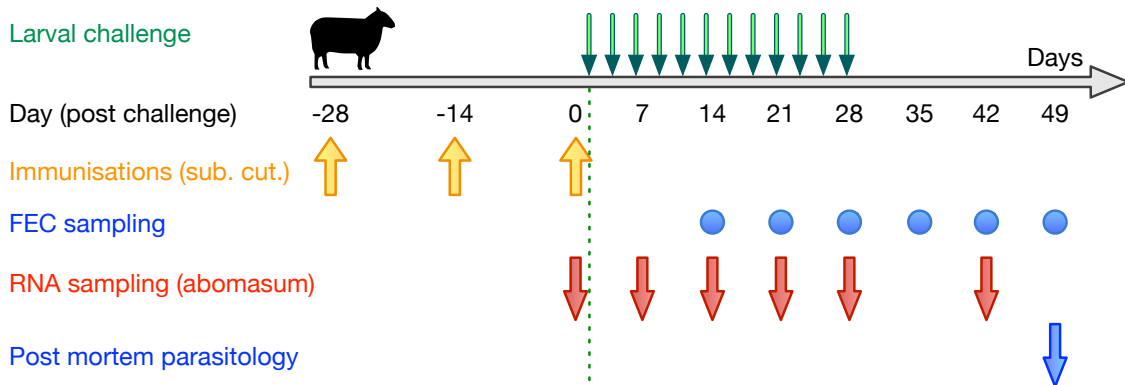

**Fig. S1.** Experimental design. Timeline of immunisation, challenge, and sampling of sheep.

631 **Methods flow overview**

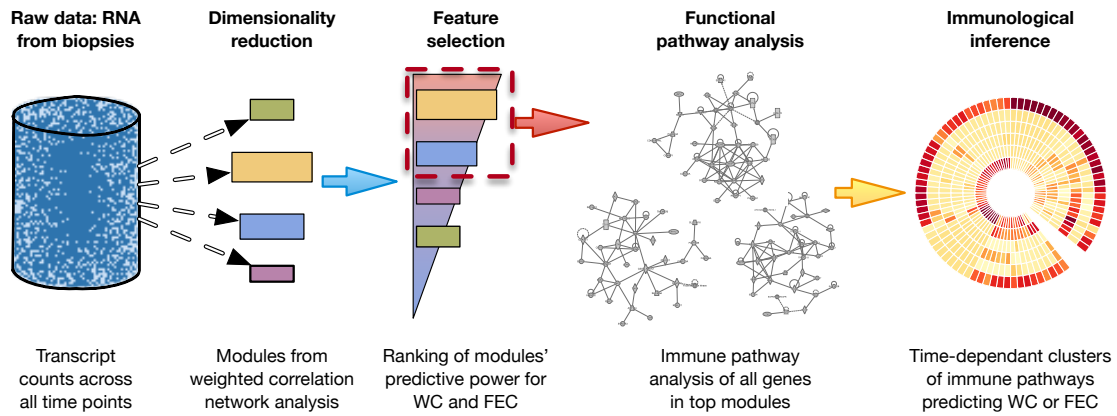

**Fig. S2.** Data analysis pipeline overview. Depiction of the flow through which raw transcript counts were taken to extract immunological information relevant to the response to vaccination and infection.

632 **Clustering of all transcriptomes using t-SNE.**

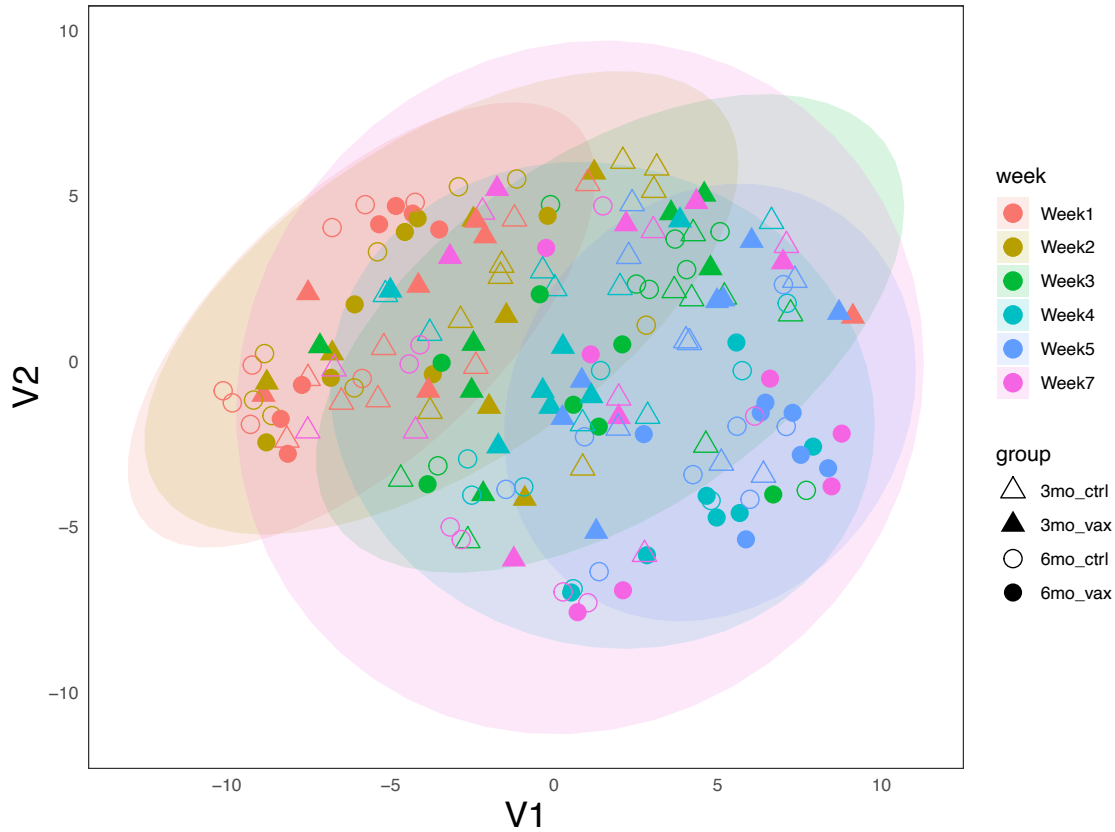

**Fig. S3.** Unsupervised clustering of transcriptomes per treatment and day post challenge. The ~15K transcripts were reduced to two components using t-Distributed Stochastic Neighbour Embedding (t-SNE) (78) to visualise the datasets in two-dimensional space. Samples clustered weakly by treatment but more distinctly by day post challenge (DPC), specifically before vs. after 14 DPC.

633 **Weight of WGCNA modules predicting parasite burdens.**

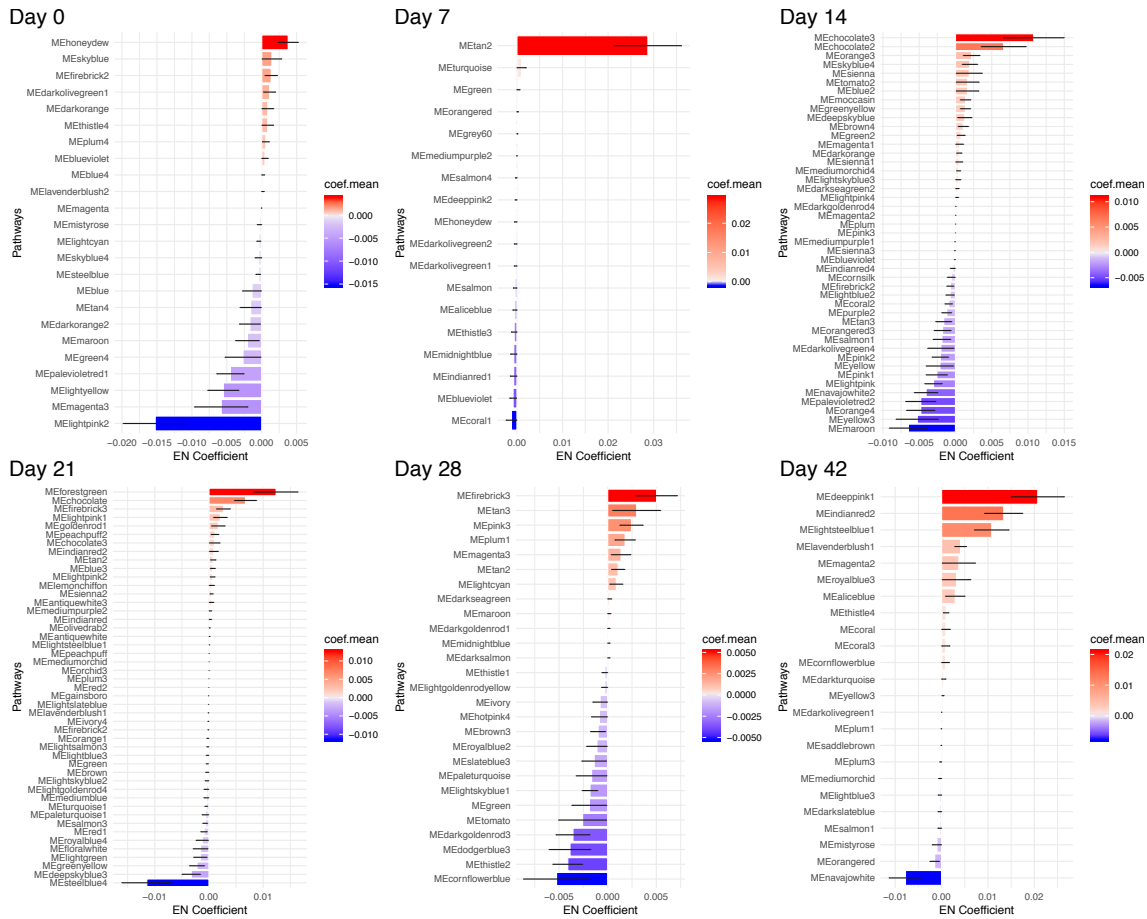

**Fig. S4.** ElasticNet coefficients bar plot of WGCNA modules associated with worm burden and cFEC across 42 days post challenge. Only modules with ElasticNet coefficients  $\neq 0$  are depicted and were retained for further analysis.

634 **Differential expression analysis of genes included in WGCNA modules.**

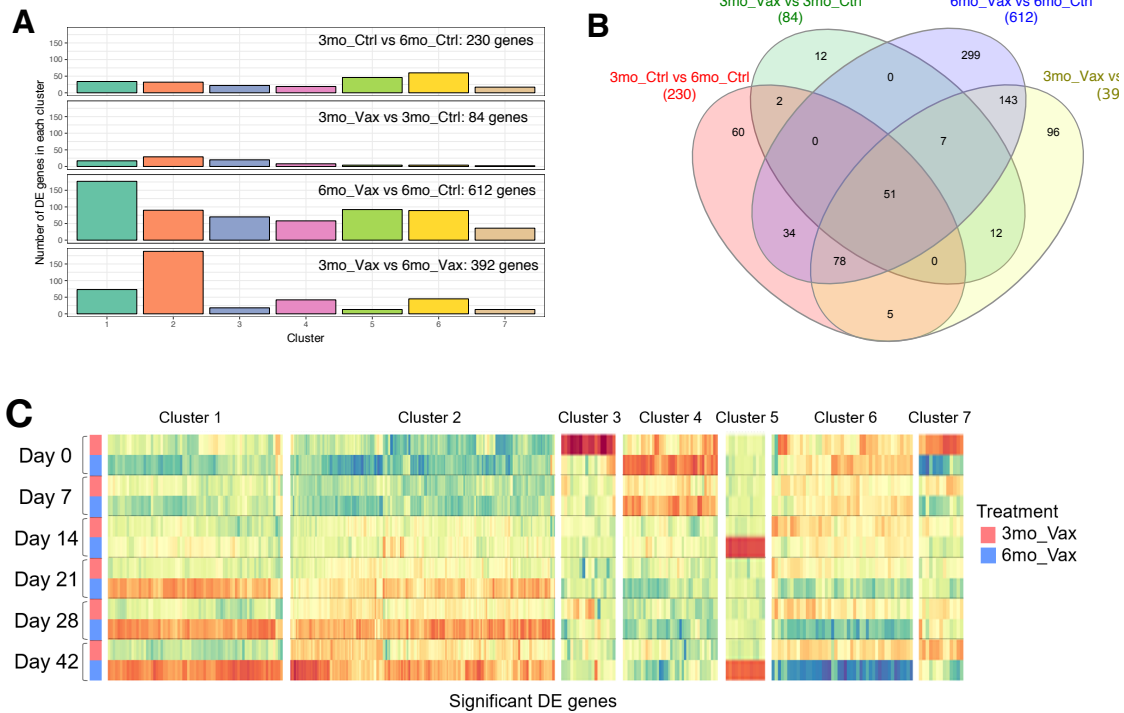

**Fig. S5.** Time dynamics of differentially expressed (DE) genes. (A), Number of DE genes in each WGCNA modules within each of 4 pairwise DE pairwise comparisons: 3 month-old control vs. 6 month-old control ('3mo-Ctrl vs 6mo-Ctrl'), 3 month-old vaccinated vs. 3 month-old control ('3mo-Vax vs 3mo-Ctrl'), 6 month-old vaccinated vs. 6 month-old control ('6mo-Vax vs 6mo-Ctrl') and 3 month-old vaccinated vs. 6 month-old vaccinated ('3mo-Vax vs 6mo-Vax'). (B), Venn diagram of all genes from four pairwise comparisons. (C) Heat map of the temporal expression patterns of significant DE gene expression. Individual genes within clusters 1–7 are shown in columns (see full gene list in Supplementary Data 2). Each row represents either 3mo or 6mo vaccinated lambs at different time points.



635 **Time-course of immune pathways significantly represented in abomasal transcriptomes**

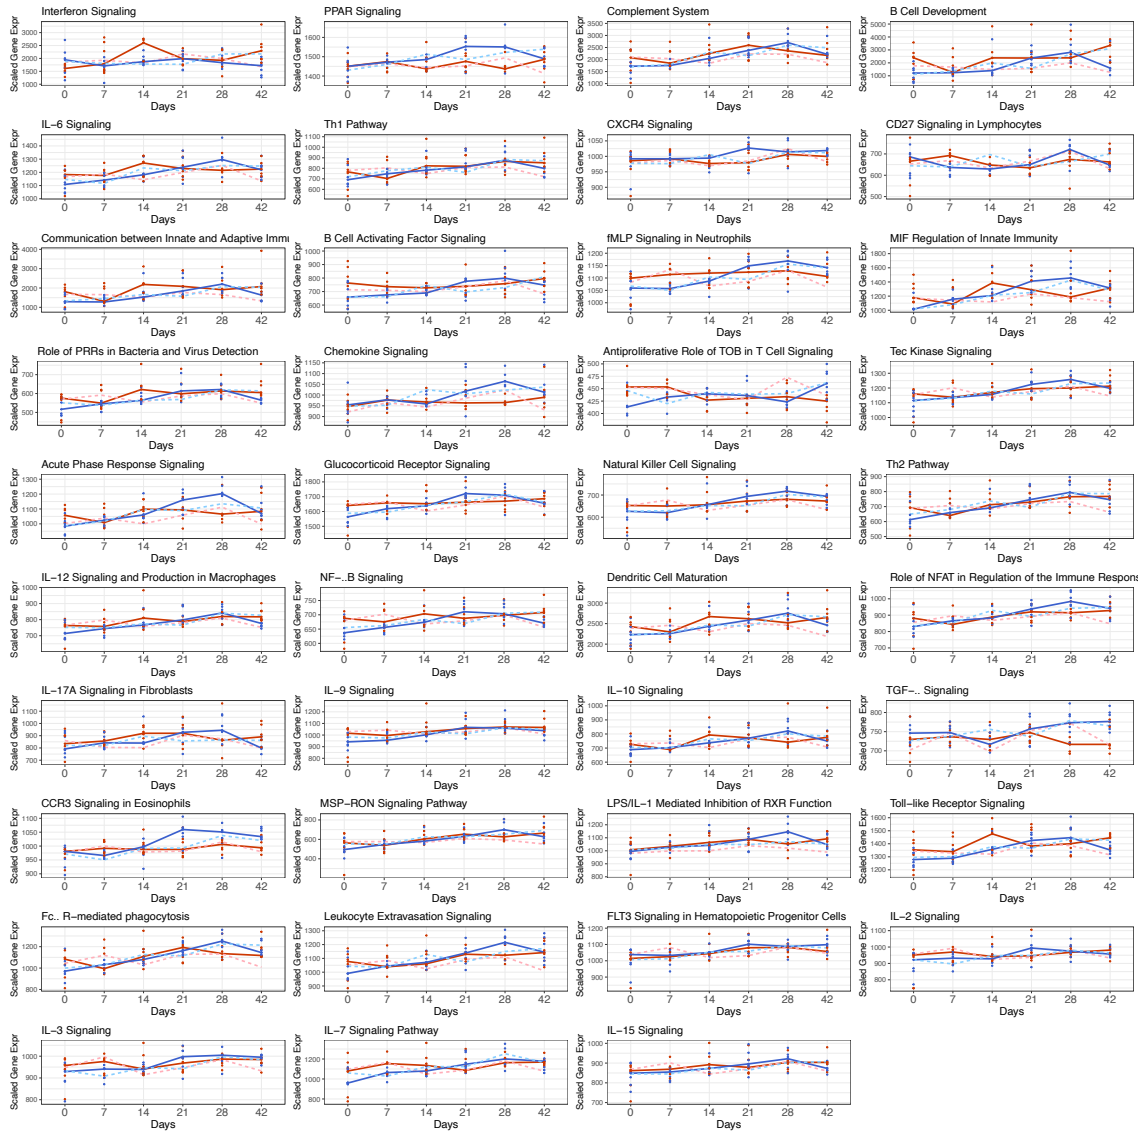

**Fig. S6.** Time course of pathways significantly represented in abomasal transcriptomes. Mean scaled expression levels in each pathway predictive of worm burdens and/or cFEC, selected in Fig. 2. Points represent individual lambs at each time point and lines represent corresponding mean values for: vaccinated (solid lines); control (dashed lines); 3-month-old (red); and 6-month-old (blue) lambs.
